# Supplementary material for: A data-driven approach to control stimulus responsivity of functional polymer materials: predicting thermoresponsive color-changing properties of polydiacetylene
Source: Royal Society of Chemistry journal article supplement (doi:10.1039/d5dd00442j), 2026-01-01
Supplement: d5dd00442j1.pdf [file d5dd00442j1.pdf]

## Electronic Supplementary Information (ESI)

**A data-driven approach to control stimulus responsivity of functional polymer materials:**

**Predicting thermoresponsive color-change properties of polydiacetylene**

Risako Shibata,<sup>a</sup> Nano Shioda,<sup>a</sup> Hiroaki Imai,<sup>a</sup> Yasuhiko Igarashi,<sup>b</sup> Yuya Oaki<sup>\*,a</sup>

<sup>a</sup> Department of Applied Chemistry, Faculty of Science and Technology, Keio University, 3-14-1 Hiyoshi, Kohoku-ku, Yokohama 223-8522, Japan.

<sup>b</sup> Faculty of Engineering, Information and Systems, University of Tsukuba, 1-1-1 Tennodai, Tsukuba 305-8573, Japan

E-mail: oakiyuya@apple.keio.ac.jp

### Contents

|                                                                  |        |
|------------------------------------------------------------------|--------|
| Experimental methods                                             | P. S2  |
| List of the guest molecules (Table S1)                           | P. S4  |
| Datasets for ML (Tables S2 and S3)                               | P. S8  |
| XRD patterns (Fig. S1)                                           | P. S10 |
| FT-IR spectra (Fig. S2)                                          | P. S12 |
| $T$ - $\Delta x$ relationship and its approximation (Fig. S3)    | P. S13 |
| Correlation analysis of $x_{Gn}$ (Fig. S4)                       | P. S20 |
| Five-fold cross validation (Fig. S5)                             | P. S21 |
| List of the new guest molecules (Table S4)                       | P. S22 |
| Structural analysis for the new layered PDAs (Fig. S6)           | P. S23 |
| $T$ - $\Delta x$ relationship for the new layered PDAs (Fig. S7) | P. S24 |

## Experimental methods

**Synthesis of the layered PDA with the intercalation of new guests:** The guest molecules with the superscripted notes “*a–f*” in Table S1 were newly used in the present work. All these new guest amines were purchased from TCI with the purity higher than 95 %. These materials were used without further purification. The synthetic methods were referred to that in our previous works.<sup>45–52</sup> The monomer solutions containing 8.83 mmol dm<sup>−3</sup> PCDA (TCI 97.0 %) were prepared with ethanol, acetone, chloroform, or toluene. The already polymerized red-color precipitate was removed by the filtration. The guest amines were added and dissolved in the 6 cm<sup>3</sup> of the monomer solutions with the following concentrations: 8.83 mmol dm<sup>−3</sup> for the monoamine guests and 4.42 mmol dm<sup>−3</sup> for the diamine guests. The molar ratio of the amino group to carboxy group was adjusted to 1.0 for all the guests. After mixing for 30 min, the solvent was evaporated at room temperature under ambient pressure. The resultant precipitate was polymerized with the UV irradiation using a handy lamp (6 W, 254 nm) for ca. 10 s.

**Structural characterization:** An increase in the interlayer distance was measured using XRD (Bruker, D8-Advance) with Cu-K $\alpha$  radiation. The changes in the carboxy and amino groups in the interlayer space were analyzed by KBr method using FT-IR (Jasco, FT/IR 4200).

**Thermoresponsive color-change properties:** The powder sample was filled in a stainless plate with a groove 5 × 7.5 mm in size. The plate was heated using a temperature-controlled stage, maintained at *T* °C to take a photograph using iPhone 13, and then heated again. The temperature range for the measurement was −50–250 °C depending on the guests. This cycle was repeated to observe the thermoresponsive color changes of the newly synthesized samples.

**Preparation of datasets:** The data about the thermoresponsive color-change properties were extracted from our previous works.<sup>45–51</sup> The layered PDA with intercalating new guests was added in the present work. The registry numbers with S---, molecular structures, and their sources were listed in Table S1.

The color in the photographs was converted to the red-color intensity (*x*) based on the RGB values using an international standard using Eqs. (S1) and (S2).

$$\begin{bmatrix} X \\ Y \\ Z \end{bmatrix} = \begin{bmatrix} 0.4124 & 0.3576 & 0.1805 \\ 0.2126 & 0.7152 & 0.0722 \\ 0.0193 & 0.1192 & 0.9505 \end{bmatrix} \begin{bmatrix} R \\ G \\ B \end{bmatrix} \dots \text{Eq. (S1)}$$

$$(x, y) = \left( \frac{x}{x+y+z}, \frac{y}{x+y+z} \right) \dots \text{Eq. (S2)}$$

An increment of  $x$  ( $\Delta x = x - x_0$ ) was calculated to the initial state ( $x_0$ ) at each  $T$ . Then,  $\Delta x$  was normalized by dividing the maximum  $\Delta x_{\max}$  ( $\Delta x / \Delta x_{\max}$ ) in each sample because the  $\Delta x$  value was varied by the intensity of the color. This normalization is needed to compare the thermoresponsivity for each sample. The relationship between  $T$  and  $\Delta x / \Delta x_{\max}$  was prepared for each layered PDA containing 75 different guests (Fig. S3). The  $T-(\Delta x / \Delta x_{\max})$  curve was approximated to a sigmoidal function Eq. (1) using the two constants  $a$  and  $b$  with a specific coefficient of determination ( $r^2$ ). In this approximation, the coefficients  $a$  and  $b$  were adjusted to achieve the highest  $r^2$  value for each guest. Then, the color-transition temperature ( $T_{\text{trs}}$ ) was defined as  $T$  to reach  $0.5\Delta x / \Delta x_{\max}$  in the fitting function Eq. (1) namely ( $T_{\text{trs}} = a$ ). The explanatory variables ( $x_{Gn}$ :  $n = 1-17$ ) were calculated using the following applications (Table 1): HSP-ip (version 5.0.03), RDKit (2017.03.1), and Gaussian 16W by density functional theory (DFT) with B3LYP based on the 6-311G basis set. These data were summarized in Tables S2 and S3, supplied as CSV files.

**Construction of the predictor:** The datasets in Table S2 and S3 were used for training and test, respectively. The correlation coefficients in the training dataset were calculated in the training dataset (Table S2). The coefficients were color-coded to check the multicollinearity (Fig. S4). ES-LiR was performed on the dataset after removing  $x_{G5}$ ,  $x_{G6}$ ,  $x_{G9}$ , and  $x_{G10}$ . Linear regression models were exhaustively prepared for all the possible combinations of  $x_{Gn}$  ( $2^n-1$  patterns), such as  $\{x_{G1} \text{ only}\}$ ,  $\{x_{G1}, x_{G2}\}$ ,  $\{x_{G1}, x_{G3}\}$ , ...,  $\{x_1, x_{Gn}\}$ ,  $\{x_{G2} \text{ only}\}$ ,  $\{x_{G2}, x_{G3}\}$ , ...,  $\{x_{Gn-1}, x_{Gn}\}$ ,  $\{x_{G1}, x_{G2}, x_{G3}\}$ ,  $\{x_{G1}, x_{G2}, x_{G4}\}$ , ...  $\{x_{G1}, x_{G2}, \dots, x_{Gn}\}$ . The resultant models were sorted in the ascending order of the CVE values. The coefficients were visualized in the weight diagram. The descriptors were selected based on the weight diagram and our chemical insight. The model was prepared using the selected  $x_{Gn}$  and then validated using the test dataset (Table S3). The five-fold cross validation was carried out using the merged datasets of the original and test datasets (Tables S2 and S3). All these algorithms were implemented in Python. The implement method and code were available at GitHub of our group. Please see Data Availability in the main text.

## List of the guest molecules

Table S1 summarizes the guest molecules intercalated in the layered PDA. The registry number, such as **S---**, was indexed in our group. The guest molecules with the superscripted notes “*a-f*” in Table S1 were newly used in the present work. The other guests were referred to our previous reports noted at the Table title. The XRD patterns and FT-IR spectra were summarized to show the characterization of the layered structures in Figs. S1 and S2, respectively. The notes *a-f* correspond to the panels in Figs. S1 and S2. The relationship between *T* and  $\Delta x$  for all the samples was summarized in Fig. S3.

**Table S1-1.** Guest molecules (25 linear alkyl amines) for training data.<sup>45</sup>

|                                                                                     |                                                                                      |                                                                                       |                                                                                     |                                                                                    |                                                                                     |
|-------------------------------------------------------------------------------------|--------------------------------------------------------------------------------------|---------------------------------------------------------------------------------------|-------------------------------------------------------------------------------------|------------------------------------------------------------------------------------|-------------------------------------------------------------------------------------|
|    |     |      |    |  |  |
| <b>S005</b>                                                                         | <b>S006</b>                                                                          | <b>S007</b>                                                                           | <b>S008</b>                                                                         | <b>S009</b>                                                                        | <b>S010</b>                                                                         |
| Methylamine                                                                         | Ethylamine                                                                           | Propylamine                                                                           | Butylamine                                                                          | Amylamine                                                                          | Hexylamine                                                                          |
| <hr/>                                                                               |                                                                                      |                                                                                       |                                                                                     |                                                                                    |                                                                                     |
|    |     |     |  |                                                                                    |                                                                                     |
| <b>S011</b>                                                                         | <b>S012</b>                                                                          | <b>S013</b>                                                                           | <b>S014</b>                                                                         |                                                                                    |                                                                                     |
| Heptylamine                                                                         | <i>n</i> -Octylamine                                                                 | Nonylamine                                                                            | 1-Aminodecane                                                                       |                                                                                    |                                                                                     |
| <hr/>                                                                               |                                                                                      |                                                                                       |                                                                                     |                                                                                    |                                                                                     |
|  |  |  |                                                                                     |                                                                                    |                                                                                     |
| <b>S015</b>                                                                         | <b>S016</b>                                                                          | <b>S017</b>                                                                           |                                                                                     |                                                                                    |                                                                                     |
| 1-Aminoundecane                                                                     | Dodecylamine                                                                         | 1-Aminotridecane                                                                      |                                                                                     |                                                                                    |                                                                                     |
| <hr/>                                                                               |                                                                                      |                                                                                       |                                                                                     |                                                                                    |                                                                                     |
|  |  |                                                                                       |                                                                                     |                                                                                    |                                                                                     |
| <b>S018</b>                                                                         | <b>S019</b>                                                                          |                                                                                       |                                                                                     |                                                                                    |                                                                                     |
| Tetradecylamine                                                                     | 1-Aminopentadecane                                                                   |                                                                                       |                                                                                     |                                                                                    |                                                                                     |
| <hr/>                                                                               |                                                                                      |                                                                                       |                                                                                     |                                                                                    |                                                                                     |
|  |   |  |                                                                                     |                                                                                    |                                                                                     |
| <b>S020</b>                                                                         | <b>S021</b>                                                                          | <b>S022</b>                                                                           |                                                                                     |                                                                                    |                                                                                     |
| Stearylamine                                                                        | 1,4-Diaminobutane                                                                    | 1,6-Diaminohexane                                                                     |                                                                                     |                                                                                    |                                                                                     |
| <hr/>                                                                               |                                                                                      |                                                                                       |                                                                                     |                                                                                    |                                                                                     |
|  |  |  |                                                                                     |                                                                                    |                                                                                     |
| <b>S023</b>                                                                         | <b>S024</b>                                                                          | <b>S025</b>                                                                           |                                                                                     |                                                                                    |                                                                                     |
| 1,8-Diaminooctane                                                                   | 1,12-Diaminododecane                                                                 | Dibutylamine                                                                          |                                                                                     |                                                                                    |                                                                                     |
| <hr/>                                                                               |                                                                                      |                                                                                       |                                                                                     |                                                                                    |                                                                                     |
|  |  |                                                                                       |                                                                                     |                                                                                    |                                                                                     |
| <b>S026</b>                                                                         | <b>S027</b>                                                                          |                                                                                       |                                                                                     |                                                                                    |                                                                                     |
| Dihexylamine                                                                        | Di- <i>n</i> -octylamine                                                             |                                                                                       |                                                                                     |                                                                                    |                                                                                     |
| <hr/>                                                                               |                                                                                      |                                                                                       |                                                                                     |                                                                                    |                                                                                     |
|  |  |                                                                                       |                                                                                     |                                                                                    |                                                                                     |
| <b>S028</b>                                                                         | <b>S029</b>                                                                          |                                                                                       |                                                                                     |                                                                                    |                                                                                     |
| Didecylamine                                                                        | Didodecylamine                                                                       |                                                                                       |                                                                                     |                                                                                    |                                                                                     |

**Table S1-2.** Guest molecules (two branched alkyl amines) for training data.<sup>45</sup>

|                                                                                   |                                                                                   |
|-----------------------------------------------------------------------------------|-----------------------------------------------------------------------------------|
| 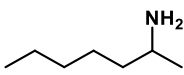 |  |
| <b>S119<sup>a</sup></b>                                                           | <b>S121<sup>a</sup></b>                                                           |
| 2-Heptylamine                                                                     | 2-Methylbutylamine                                                                |

**Table S1-3.** Guest molecules (three polymers) for training data.<sup>48,50</sup>

|                                                                                   |                                                                                    |
|-----------------------------------------------------------------------------------|------------------------------------------------------------------------------------|
| 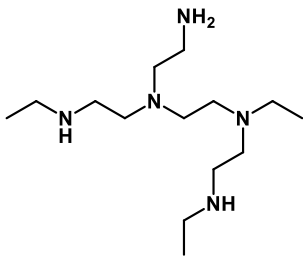 |  |
| <b>S047<sup>a</sup></b>                                                           | <b>S048</b>                                                                        |
| Polyethylenimine, branched                                                        | Polyethylenimine, linear                                                           |

---

|                                                                                   |
|-----------------------------------------------------------------------------------|
|  |
| <b>S049</b>                                                                       |
| Poly(allylamine)                                                                  |

**Table S1-4.** Guest molecules (four amino-alcohols) for training data.

|                                                                                     |                                                                                     |                                                                                      |                                                                                       |
|-------------------------------------------------------------------------------------|-------------------------------------------------------------------------------------|--------------------------------------------------------------------------------------|---------------------------------------------------------------------------------------|
| 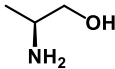 |  |  |  |
| <b>S054<sup>a</sup></b>                                                             | <b>S056<sup>a</sup></b>                                                             | <b>S058<sup>a</sup></b>                                                              | <b>S060<sup>a</sup></b>                                                               |
| (S)- (+)-2-Amino-1-propanol                                                         | (R)- (-)-2-Amino-1-propanol                                                         | (S)-3-Amino-1,2-propanediol                                                          | (R)-3-Amino-1,2-propanediol                                                           |

**Table S1-5.** Guest molecules (eight amines containing benzene ring) for training data.<sup>46,51</sup>

|                                                                                     |                                                                                     |                                                                                     |                                                                                      |                                                                                       |
|-------------------------------------------------------------------------------------|-------------------------------------------------------------------------------------|-------------------------------------------------------------------------------------|--------------------------------------------------------------------------------------|---------------------------------------------------------------------------------------|
| 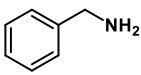 |  |  |  |  |
| <b>S069</b>                                                                         | <b>S070<sup>b</sup></b>                                                             | <b>S071<sup>b</sup></b>                                                             | <b>S073</b>                                                                          | <b>S074<sup>b</sup></b>                                                               |
| Benzylamine                                                                         | 2-Phenylethylamine                                                                  | 3-Phenylpropylamine                                                                 | <i>p</i> -Xylylenediamine                                                            | <i>m</i> -Xylylenediamine                                                             |

---

|                                                                                     |                                                                                     |                                                                                     |
|-------------------------------------------------------------------------------------|-------------------------------------------------------------------------------------|-------------------------------------------------------------------------------------|
|  |  |  |
| <b>S075<sup>b</sup></b>                                                             | <b>S077<sup>b</sup></b>                                                             | <b>S078<sup>b</sup></b>                                                             |
| Benzhydrylamine                                                                     | Tyramine                                                                            | Tryptamine                                                                          |

**Table S1-6.** Guest molecules (nine amines containing cycloalkane rings) for training data.

|                                                                                           |                                                                                                      |                                                                                   |                                                                                         |                                                                                     |
|-------------------------------------------------------------------------------------------|------------------------------------------------------------------------------------------------------|-----------------------------------------------------------------------------------|-----------------------------------------------------------------------------------------|-------------------------------------------------------------------------------------|
| 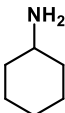         |                     |  |      |                                                                                     |
| <b>S145<sup>c</sup></b><br>Cyclohexylamine<br>(cC6amine)                                  | <b>S146<sup>c</sup></b><br>Cyclooctylamine<br>(cC8amine)                                             | <b>S147<sup>c</sup></b><br>Hexamethyleneimine<br>(cC6imine)                       | <b>S150<sup>c</sup></b><br><i>cis</i> -1,3-Cyclohexanediamine<br>( <i>cis-m</i> -cC6di) |                                                                                     |
|          |                     |  |       |  |
| <b>S152<sup>c</sup></b><br>4,4'-<br>Methylenebis(cyclohexylamine)<br>(mixture of isomers) | <b>S153<sup>c</sup></b><br>Cyclopropylami<br>ne<br>(cC3amine)                                        | <b>S154<sup>c</sup></b><br>Aminocyclobutane<br>(cC4amine)                         | <b>S155<sup>c</sup></b><br>Cyclohexanemeth<br>ylamine<br>(cC6methylamine)               | <b>S156<sup>c</sup></b><br>2-Cyclohexylethylamine<br>(cC6ethylamine)                |
|          |                     |  |       |                                                                                     |
| <b>S157<sup>c</sup></b><br><i>cis</i> -1,4-Cyclohexanediamine<br>( <i>cis-p</i> -cC6di)   | <b>S158<sup>c</sup></b><br><i>trans</i> -1,4-<br>Cyclohexanedia<br>mine ( <i>trans-p</i> -<br>cC6di) | <b>S159<sup>c</sup></b><br><i>cis</i> -1,4-Bis<br>(aminomethyl)cyclo<br>hexane    | <b>S160<sup>c</sup></b><br><i>trans</i> -1,4-Bis<br>(aminomethyl)cycl<br>ohexane        |                                                                                     |

**Table S1-7.** Guest molecules (five amines containing benzene ring) for training data.

|                                                                                     |                                                                                     |                                                                                     |                                                                                      |                                                                                       |
|-------------------------------------------------------------------------------------|-------------------------------------------------------------------------------------|-------------------------------------------------------------------------------------|--------------------------------------------------------------------------------------|---------------------------------------------------------------------------------------|
| 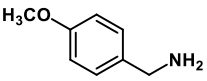 |  |  |  |  |
| <b>S105<sup>d</sup></b><br>4-Methoxybenzylamine<br>( <i>p</i> -OMeBA)               | <b>S106<sup>d</sup></b><br>2-<br>Methoxybenzylami<br>ne<br>( <i>o</i> -OMeBA)       | <b>S107<sup>d</sup></b><br>3-Methoxybenzylamine<br>( <i>m</i> -OMeBA)               | <b>S108<sup>d</sup></b><br>1-<br>Naphthylmethyla<br>mine<br>(NpMeA)                  | <b>S111<sup>d</sup></b><br>4-Fluorobenzylamine<br>(FBA)                               |

**Table S1-8.** Guest molecules (five amines containing heteroaromatic rings) for training data.<sup>49</sup>

|                                                                                   |                                                                                   |                                                                                   |                                                                                    |                                                                                     |
|-----------------------------------------------------------------------------------|-----------------------------------------------------------------------------------|-----------------------------------------------------------------------------------|------------------------------------------------------------------------------------|-------------------------------------------------------------------------------------|
|  |  |  |  |  |
| S033 <sup>e</sup>                                                                 | S035 <sup>e</sup>                                                                 | S110 <sup>e</sup>                                                                 | S128                                                                               | S131                                                                                |
| Imidazole                                                                         | 1-(3-Aminopropyl)imidazole                                                        | 2-(2-Aminoethyl)thiophene (AETp)                                                  | 4,4'-Bipyridyl                                                                     | 3,3'-Bipyridyl                                                                      |

**Table S1-9.** Guest molecules (ten other amines) for training data.<sup>47</sup>

|                                                                                   |                                                                                   |                                                                                    |                                                                                     |
|-----------------------------------------------------------------------------------|-----------------------------------------------------------------------------------|------------------------------------------------------------------------------------|-------------------------------------------------------------------------------------|
| 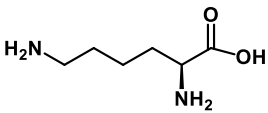 |  |  |  |
| S041                                                                              | S066 <sup>f</sup>                                                                 | S067 <sup>f</sup>                                                                  | S083                                                                                |
| L-(+)-Lysine                                                                      | 3-Aminopropyltrimethoxysilane                                                     | 3-Aminopropyldiethoxymethylsilane                                                  | 1-(4-Cyanophenyl)guanidine                                                          |

  

|                                                                                     |                                                                                     |                                                                                      |                                                                                       |
|-------------------------------------------------------------------------------------|-------------------------------------------------------------------------------------|--------------------------------------------------------------------------------------|---------------------------------------------------------------------------------------|
|  |  |  |  |
| S085                                                                                | S088 <sup>f</sup>                                                                   | S112 <sup>f</sup>                                                                    | S140 <sup>f</sup>                                                                     |
| 1-(tert-Butoxycarbonyl)guanidine                                                    | 3-Butoxypropylamine                                                                 | Diethylenetriamine                                                                   | Suberic acid                                                                          |

  

|                                                                                     |                                                                                     |
|-------------------------------------------------------------------------------------|-------------------------------------------------------------------------------------|
|  |  |
| S142 <sup>f</sup>                                                                   | S161 <sup>f</sup>                                                                   |
| 1,4-Phenylenediacetic acid                                                          | N-(2-Aminoethyl)glycine                                                             |

## Datasets for ML

**Table S2.** Training dataset containing 65 y.

|      | XG1   | XG2   | XG3   | XG4   | XG5   | XG6    | XG7 | XG8  | XG9   | XG10    | XG11     | XG12  | XG13   | XG14   | XG15   | XG16   | XG17 | T <sub>irs</sub> |
|------|-------|-------|-------|-------|-------|--------|-----|------|-------|---------|----------|-------|--------|--------|--------|--------|------|------------------|
| S005 | 17.11 | 7.71  | 13.02 | 0.656 | 47.3  | 65.46  | -22 | -71  | 1.035 | 31.058  | -0.4251  | 26.02 | 2.958  | -0.695 | 19.6   | 1.3014 | 1    | 57.58            |
| S006 | 15.8  | 6.34  | 10.04 | 0.7   | 64.4  | 87.31  | 16  | -82  | 1.123 | 45.085  | -0.035   | 26.02 | 3.796  | -0.686 | 31.45  | 1.2858 | 1    | 48.89            |
| S007 | 15.71 | 5.15  | 8.33  | 0.723 | 81.8  | 108.95 | 48  | -79  | 1.196 | 59.112  | 0.3551   | 26.02 | 5.292  | -0.697 | 42.56  | 1.2265 | 1    | 49.61            |
| S008 | 15.82 | 4.6   | 8.38  | 0.738 | 99.1  | 131.19 | 77  | -65  | 1.267 | 73.139  | 0.7452   | 26.02 | 6.301  | -0.696 | 53.85  | 1.2516 | 1    | 35.74            |
| S010 | 15.99 | 3.94  | 7.48  | 0.769 | 131.6 | 174.69 | 133 | -50  | 1.397 | 101.193 | 1.5254   | 26.02 | 8.258  | -0.663 | 76.8   | 1.237  | 1    | 59.45            |
| S011 | 16.01 | 3.89  | 6.12  | 0.778 | 148.1 | 196.89 | 156 | -27  | 1.455 | 115.22  | 1.9155   | 26.02 | 7.139  | -0.696 | 88.21  | 1.2091 | 1    | 50.62            |
| S012 | 16.04 | 3.18  | 5.39  | 0.783 | 165   | 219.14 | 178 | -14  | 1.506 | 129.247 | 2.3056   | 26.02 | 8.883  | -0.663 | 99.37  | 1.2549 | 1    | 63.32            |
| S013 | 16.08 | 3.01  | 5.12  | 0.792 | 180.9 | 240.27 | 199 | 19   | 1.553 | 143.274 | 2.6957   | 26.02 | 10.451 | -0.697 | 110.83 | 1.2425 | 1    | 51.16            |
| S014 | 16.09 | 2.9   | 5.3   | 0.796 | 197.5 | 262.64 | 220 | 12   | 1.601 | 157.301 | 3.0858   | 26.02 | 11.322 | -0.720 | 123    | 1.2399 | 1    | 73.86            |
| S015 | 16.07 | 2.94  | 4.4   | 0.8   | 214   | 284.83 | 237 | 20   | 1.646 | 171.328 | 3.4759   | 26.02 | 12.071 | -0.668 | 134.05 | 1.287  | 1    | 66.23            |
| S016 | 16.08 | 2.42  | 3.95  | 0.802 | 231   | 307.08 | 252 | 42   | 1.687 | 185.355 | 3.866    | 26.02 | 12.489 | -0.696 | 146.31 | 1.2382 | 1    | 99.59            |
| S017 | 16.09 | 2.32  | 3.85  | 0.808 | 246.9 | 327.83 | 270 | 35   | 1.723 | 199.382 | 4.2561   | 26.02 | 13.939 | -0.696 | 157.98 | 1.205  | 1    | 63.44            |
| S018 | 16.07 | 2.26  | 4.12  | 0.81  | 263.5 | 350.58 | 288 | 42   | 1.764 | 213.409 | 4.6462   | 26.02 | 14.042 | -0.696 | 169.67 | 1.2375 | 1    | 80.55            |
| S019 | 16.05 | 2.34  | 3.42  | 0.812 | 280   | 372.78 | 303 | 57   | 1.801 | 227.436 | 5.0363   | 26.02 | 11.125 | -0.696 | 181.36 | 1.2044 | 1    | 71.89            |
| S020 | 16.03 | 1.82  | 3.36  | 0.818 | 329.5 | 438.53 | 345 | 71   | 1.901 | 269.517 | 6.2066   | 26.02 | 14.783 | -0.696 | 216.47 | 1.2366 | 1    | 90.61            |
| S021 | 17.01 | 6     | 10.27 | 0.864 | 102   | 148.88 | 160 | 14   | 1.41  | 88.154  | -0.316   | 52.04 | 7.254  | -0.696 | 60.86  | 0.0001 | 2    | 94.75            |
| S022 | 16.76 | 5.26  | 9.62  | 0.864 | 134.5 | 192.38 | 203 | 27   | 1.516 | 116.208 | 0.4642   | 52.04 | 7.264  | -0.696 | 83.79  | 1.8913 | 2    | 99.47            |
| S023 | 16.57 | 4.39  | 6.49  | 0.859 | 168   | 236.82 | 236 | -5   | 1.609 | 144.262 | 1.2444   | 52.04 | 10.054 | -0.696 | 106.92 | 1.8934 | 2    | 99.83            |
| S024 | 16.34 | 3.41  | 4.54  | 0.857 | 233.9 | 324.77 | 298 | 81   | 1.769 | 200.37  | 2.8048   | 52.04 | 12.991 | -0.696 | 153.51 | 1.8928 | 2    | 99.59            |
| S025 | 15.79 | 2.68  | 4.4   | 0.754 | 171.3 | 218.83 | 150 | -42  | 1.467 | 129.247 | 2.1762   | 12.03 | 8.860  | -0.541 | 101.21 | 0.889  | 1    | 68.25            |
| S027 | 16    | 1.57  | 2.65  | 0.796 | 303.3 | 394.72 | 287 | -3   | 1.809 | 241.463 | 5.297    | 12.03 | 14.945 | -0.526 | 194.55 | 0.8706 | 1    | 49.84            |
| S028 | 16.02 | 1.47  | 2.45  | 0.808 | 368.3 | 481.72 | 349 | 18   | 1.939 | 297.571 | 6.8574   | 12.03 | 15.730 | -0.542 | 241.4  | 0.8683 | 1    | 60.36            |
| S029 | 15.99 | 1.01  | 1.9   | 0.813 | 435.2 | 570.61 | 386 | 50   | 2.055 | 353.679 | 8.4178   | 12.03 | 22.514 | -0.542 | 286.84 | 0.8807 | 1    | 58.56            |
| S033 | 19.72 | 12.46 | 12.01 | 1.02  | 66.7  | 94.2   | 163 | 33   | 1.184 | 68.079  | 0.4097   | 28.68 | 4.257  | -0.610 | 39     | 4.0312 | 1    | 47.51            |
| S035 | 18.25 | 8.5   | 8.25  | 0.997 | 125.6 | 167.81 | 246 | 172  | 1.384 | 125.175 | 0.2319   | 43.84 | 7.046  | -0.698 | 80.98  | 5.1453 | 2    | 68.75            |
| S041 | 16.77 | 7.19  | 14.28 | 1.079 | 135.5 | 200.61 | 314 | 349  | 1.573 | 146.19  | -0.4727  | 89.34 | 8.986  | -0.690 | 86.55  | 0.4144 | 2    | 103.01           |
| S048 | 16.51 | 4.17  | 6.44  | 0.905 | 286.6 | 396.23 | 317 | -41  | 1.885 | 259.442 | -0.6357  | 60.15 | 17.951 | -0.551 | 245.04 | 0.9341 | 1    | 43.36            |
| S049 | 16.61 | 3.72  | 5.92  | 0.952 | 346.1 | 474.76 | 524 | 227  | 1.992 | 329.577 | 1.2413   | 130.1 | 14.410 | -0.736 | 322.88 | 1.1402 | 1    | 47.44            |
| S056 | 17.27 | 8.48  | 17.62 | 0.95  | 79.1  | 115.2  | 163 | -20  | 1.293 | 75.111  | -0.6741  | 46.25 | 4.444  | -0.702 | 46.29  | 1.0473 | 1    | 63.82            |
| S058 | 18.34 | 10.9  | 22.51 | 1.154 | 78.9  | 128.98 | 248 | 17   | 1.45  | 91.11   | -1.7017  | 66.48 | 5.624  | -0.697 | 48.56  | 2.466  | 1    | 83.67            |
| S060 | 18.34 | 10.9  | 22.51 | 1.154 | 78.9  | 128.98 | 248 | 17   | 1.45  | 91.11   | -1.7017  | 66.48 | 5.417  | -0.676 | 48.55  | 1.9734 | 1    | 79.26            |
| S066 | 14.23 | 4.23  | 5.43  | 0.983 | 182.3 | 248.06 | 178 | 58   | 1.596 | 179.292 | 0.2133   | 53.71 | 8.461  | -0.834 | 104.44 | 0.6564 | 1    | 82.01            |
| S069 | 18.78 | 4.57  | 7.09  | 0.976 | 109.8 | 146.96 | 185 | -2   | 1.325 | 107.156 | 1.1453   | 26.02 | 7.027  | -0.685 | 77.57  | 1.4882 | 1    | 75.18            |
| S070 | 18.38 | 4.26  | 7.06  | 0.958 | 126.4 | 168.93 | 207 | -48  | 1.387 | 121.183 | 1.1878   | 26.02 | 7.188  | -0.696 | 89.52  | 1.321  | 1    | 72.42            |
| S071 | 18.06 | 3.93  | 5.75  | 0.946 | 142.9 | 191.13 | 225 | -24  | 1.446 | 135.21  | 1.5779   | 26.02 | 8.091  | -0.697 | 101.34 | 1.4195 | 1    | 48.11            |
| S073 | 19.32 | 6.06  | 9.04  | 1.047 | 130.1 | 186.71 | 275 | -30  | 1.504 | 136.198 | 0.604    | 52.04 | 8.266  | -0.686 | 98.8   | 1.259  | 2    | 97.22            |
| S074 | 19.14 | 5.35  | 8.05  | 1.045 | 130.4 | 186.78 | 278 | -42  | 1.502 | 136.198 | 0.604    | 52.04 | 7.884  | -0.686 | 97.97  | 0.1359 | 2    | 81.12            |
| S077 | 19.15 | 6.66  | 12.88 | 1.068 | 128.4 | 180.88 | 284 | 37   | 1.469 | 137.182 | 0.8934   | 46.25 | 8.712  | -0.696 | 94.75  | 1.2187 | 1    | 71.89            |
| S078 | 19.81 | 7.17  | 8.75  | 1.112 | 144.1 | 202.15 | 321 | 143  | 1.521 | 160.22  | 1.6691   | 41.81 | 7.773  | -0.735 | 117.7  | 2.878  | 1    | 53.26            |
| S083 | 21.26 | 15.1  | 15.51 | 1.249 | 128.2 | 191.38 | 310 | -90  | 1.557 | 160.18  | -1.17022 | 85.64 | 9.513  | -0.802 | 118.59 | 5.2605 | 1    | 40.35            |
| S085 | 17.71 | 11.6  | 14.28 | 1.107 | 143.8 | 204.3  | 217 | 143  | 1.539 | 159.189 | -1.6293  | 88.15 | 8.089  | -0.773 | 95.09  | 3.5414 | 1    | 30.57            |
| S088 | 16.09 | 5.06  | 6.96  | 0.842 | 155.8 | 209.36 | 172 | -80  | 1.495 | 131.219 | 1.1519   | 35.25 | 9.380  | -0.694 | 93.19  | 2.1838 | 1    | 50.98            |
| S105 | 18.98 | 6.45  | 8.01  | 1.049 | 130.7 | 180.28 | 241 | -15  | 1.448 | 137.182 | 1.1539   | 35.25 | 8.999  | -0.685 | 96.15  | 1.3346 | 1    | 77.77            |
| S106 | 18.87 | 6.03  | 7.51  | 1.05  | 130.7 | 179.67 | 225 | -27  | 1.443 | 137.182 | 1.1539   | 35.25 | 7.059  | -0.703 | 94.22  | 2.1774 | 1    | 71.92            |
| S107 | 18.8  | 5.74  | 7.02  | 1.047 | 131   | 180.35 | 242 | -31  | 1.446 | 137.182 | 1.1539   | 35.25 | 7.127  | -0.686 | 95.11  | 2.584  | 1    | 87.81            |
| S110 | 18.89 | 5.26  | 9.88  | 1.099 | 115.8 | 158.5  | 198 | -12  | 1.38  | 127.212 | 1.2493   | 26.02 | 7.697  | -0.699 | 84     | 2.1548 | 1    | 80.55            |
| S111 | 18.73 | 6.18  | 7.27  | 1.094 | 114.4 | 155.41 | 183 | 2    | 1.364 | 125.146 | 1.2844   | 26.02 | 7.342  | -0.683 | 77.57  | 3.609  | 1    | 92.61            |
| S112 | 17.48 | 6.9   | 15.02 | 0.935 | 110.3 | 165.32 | 212 | -9   | 1.486 | 103.169 | -1.5066  | 64.07 | 7.894  | -0.699 | 68.94  | 1.4154 | 2    | 72.99            |
| S119 | 15.95 | 3.24  | 6.06  | 0.777 | 148.3 | 191.03 | 147 | -48  | 1.41  | 115.22  | 1.9139   | 26.02 | 8.416  | -0.660 | 88.44  | 1.1653 | 1    | 60.68            |
| S131 | 20.2  | 7.5   | 5.71  | 1.138 | 137.3 | 183.28 | 285 | 67   | 1.424 | 156.188 | 2.1436   | 25.78 | 9.239  | -0.250 | 114.66 | 1.5118 | 2    | 58.84            |
| S140 | 16.81 | 7.4   | 15.02 | 1.106 | 157.5 | 228.26 | 344 | 105  | 1.619 | 174.196 | 1.4962   | 74.6  | 10.187 | -0.542 | 99.28  | 2.3149 | 2    | 78.62            |
| S142 | 18.97 | 7.78  | 15.99 | 1.268 | 153.1 | 222.59 | 386 | 182  | 1.609 | 194.186 | 0.9408   | 74.6  | 10.158 | -0.539 | 114.55 | 2.7234 | 2    | 74.71            |
| S145 | 17.19 | 3.61  | 6.07  | 0.864 | 114.8 | 157.35 | 141 | -92  | 1.378 | 99.177  | 1.2778   | 26.02 | 5.775  | -0.666 | 72.42  | 1.1895 | 1    | 55.02            |
| S146 | 17.21 | 3.34  | 5.34  | 0.863 | 147.5 | 195.55 | 188 | -40  | 1.449 | 127.231 | 2.058    | 26.02 | 6.288  | -0.705 | 93.92  | 1.1495 | 1    | 44.95            |
| S147 | 17.2  | 4.5   | 5.68  | 0.855 | 116   | 149.9  | 135 | -23  | 1.304 | 99.177  | 1.15     | 12.03 | 5.227  | -0.499 | 72.23  | 0.9897 | 1    | 44.51            |
| S150 | 17.61 | 5.41  | 8.16  | 0.908 | 125.7 | 181.11 | 191 | -62  | 1.492 | 114.192 | 0.215    | 52.04 | 6.099  | -0.665 | 79.8   | 1.3988 | 2    | 90.25            |
| S152 | 17.66 | 3.98  | 5.53  | 0.933 | 225.4 | 299.29 | 343 | 166  | 1.671 | 210.365 | 2.4115   | 52.04 | 11.033 | -0.670 | 155.47 | 1.1363 | 2    | 46.40            |
| S153 | 17.12 | 5.65  | 9.49  | 0.869 | 65.7  | 104.59 | 79  | -119 | 1.329 | 57.096  | 0.1075   | 26.02 | 4.222  | -0.666 | 38.99  | 1.2419 | 1    | 44.78            |
| S154 | 17.32 | 5.19  | 7.78  | 0.866 | 82.1  | 122    | 93  | -125 | 1.336 | 71.123  | 0.4976   | 26.02 | 4.697  | -0.685 | 50.52  | 1.2708 | 1    | 48.85            |
| S156 | 17.02 | 3.32  | 5.82  | 0.873 | 145.7 | 195.49 | 189 | -49  | 1.46  | 127.231 | 1.9155   | 26.02 | 7.043  | -0.698 | 94.62  | 1.2392 | 1    | 65.84            |
| S157 | 17.57 | 5.26  | 8.62  | 0.911 | 125.4 | 182.03 | 206 | -24  | 1.503 | 114.192 | 0.215    | 52.04 | 6.312  | -0.699 | 79.05  | 1.7788 | 2    | 71.96            |
| S158 | 17.57 | 5.26  | 8.62  | 0.911 | 125.4 | 182.03 | 206 | -24  | 1.503 | 114.192 | 0.215    | 52.04 | 6.735  | -0.655 | 78.19  | 1.9622 | 2    | 68.66            |
| S159 | 17.39 | 4.82  | 7.5   | 0.916 | 155.3 | 219.64 | 245 | -11  | 1.572 | 142.246 | 0.7102   | 52.04 | 8.726  | -0.698 | 100.73 | 1.9041 | 2    | 62.40            |
| S160 | 17.39 | 4.82  | 7.5   | 0.916 | 155.3 | 219.64 | 245 | -11  | 1.572 | 142.246 | 0.7102   | 52.04 | 9.098  | -0.696 | 99.91  | 2.3708 | 2    | 108.77           |
| S161 | 17.02 | 8.74  | 17.8  | 1.123 | 105.2 | 161.28 | 274 | 351  | 1.497 | 118.136 | -1.3807  | 75.35 | 6.816  | -0.698 | 65.2   | 2.2958 | 2    | 146.25           |



**Table S3.** Test dataset containing 10 y.

|             | $x_{G1}$ | $x_{G2}$ | $x_{G3}$ | $x_{G4}$ | $x_{G5}$ | $x_{G6}$ | $x_{G7}$ | $x_{G8}$ | $x_{G9}$ | $x_{G10}$ | $x_{G11}$ | $x_{G12}$ | $x_{G13}$ | $x_{G14}$ | $x_{G15}$ | $x_{G16}$ | $x_{G17}$ | $T_{\text{irs}}$ |
|-------------|----------|----------|----------|----------|----------|----------|----------|----------|----------|-----------|-----------|-----------|-----------|-----------|-----------|-----------|-----------|------------------|
| <b>S009</b> | 15.92    | 4.22     | 7.61     | 0.758    | 115      | 152.72   | 107      | -53      | 1.336    | 87.166    | 1.1353    | 26.02     | 7.209     | -0.665    | 65.05     | 1.2329    | 1         | 50.31            |
| <b>S026</b> | 15.99    | 2.27     | 3.59     | 0.784    | 236.4    | 305.83   | 227      | -28      | 1.654    | 185.355   | 3.7366    | 12.03     | 13.456    | -0.526    | 147.79    | 0.8758    | 1         | 51.39            |
| <b>S047</b> | 16.01    | 4.17     | 7.98     | 0.906    | 301.9    | 406.68   | 332      | -4       | 1.869    | 273.469   | -0.212    | 56.56     | 12.925    | -0.703    | 336.58    | 3.0527    | 1         | 38.18            |
| <b>S054</b> | 17.27    | 8.48     | 17.62    | 0.95     | 79.1     | 115.2    | 163      | -20      | 1.293    | 75.111    | -0.6741   | 46.25     | 4.696     | -0.661    | 46.25     | 2.8448    | 1         | 60.71            |
| <b>S067</b> | 14.33    | 3.75     | 4.01     | 0.902    | 212.1    | 275.59   | 208      | 33       | 1.603    | 191.347   | 1.4802    | 44.48     | 8.751     | -0.997    | 126.62    | 3.2724    | 1         | 56.90            |
| <b>S075</b> | 18.99    | 3.02     | 4.87     | 1.054    | 173.8    | 223.72   | 309      | 66       | 1.486    | 183.254   | 2.7347    | 26.02     | 9.317     | -0.701    | 137.26    | 1.1596    | 1         | 62.57            |
| <b>S108</b> | 19.97    | 4.71     | 6.61     | 1.087    | 144.7    | 167.64   | 284      | 111      | 1.258    | 157.216   | 2.2985    | 26.02     | 7.696     | -0.698    | 122.84    | 1.6124    | 1         | 133.59           |
| <b>S121</b> | 15.67    | 3.68     | 6.16     | 0.753    | 115.8    | 148.29   | 96       | -74      | 1.291    | 87.166    | 0.9912    | 26.02     | 6.159     | -0.696    | 65.1      | 1.4741    | 1         | 84.94            |
| <b>S128</b> | 20.2     | 7.5      | 5.71     | 1.138    | 137.3    | 183.28   | 285      | 65       | 1.424    | 156.188   | 2.1436    | 25.78     | 7.875     | -0.227    | 113.26    | 0         | 2         | 51.31            |
| <b>S155</b> | 17.11    | 3.44     | 5.68     | 0.872    | 129.8    | 175.86   | 165      | -44      | 1.419    | 113.204   | 1.5254    | 26.02     | 6.805     | -0.694    | 83.38     | 1.2931    | 1         | 33.81            |

## XRD patterns

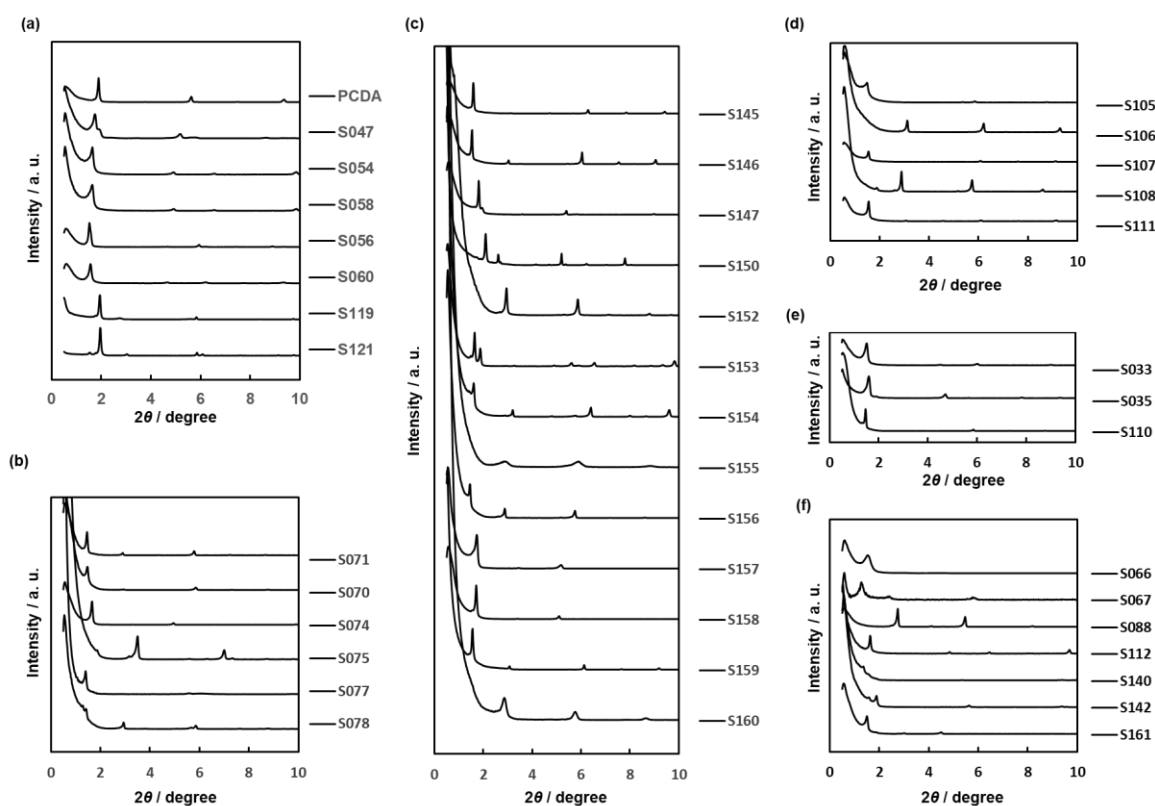

**Fig. S1.** XRD patterns of the newly synthesized layered PDA with the intercalation of the guests. (a) Polymeric and branched alkyl amines and amino-alcohols. (b) Amins containing benzene rings. (c) Amines containing cycloalkane rings. (d) Benzylamine derivatives. (e) Amins containing heteroaromatic rings. (f) Others.

The original PCDA without the guest showed the interlayer distance ( $d_0$ ) 4.66 nm. The peak shift indicating the intercalation of the guests was observed for all these guests. The observed  $d_0$  was as follows: (a) 5.05 nm for **S047**, 5.38 nm for **S054**, 5.79 nm for **S058**, 5.39 nm for **S056**, 5.63 nm for **S060**, 3.21 nm for **S119**, 5.74 nm for **S121**. (b) 5.99 nm for **S071**, 6.06 nm for **S070**, 5.32 nm for **S074**, 5.12 nm for **S075**, 6.32 nm for **S077**, 7.23 nm for **S078**. (c) 5.55 nm for **S145**, 5.75 nm for **S146**, 4.87 nm for **S147**, 4.18 nm for **S150**, 5.98 nm for **S152**, 5.37 nm for **S153**, 5.50 nm for **S154**, 6.18 nm for **S155**, 6.08 nm for **S156**, 5.01 nm for **S157**, 5.16 nm for **S158**, 5.26 nm for **S159**, 5.40 nm for **S160**. (d) 6.02 nm for **S105**, 5.94 nm for **S106**, 5.80 nm for **S107**, 6.16 nm for **S108**, 5.75 nm for **S111**. (e) 5.88 nm for **S033**, 5.50 nm for **S035**, 6.03 nm for **S110**. (f) 6.07 nm for **S066**, 7.23 nm for **S067**, 3.21 nm for **S088**, 5.41 nm for **S112**, 6.51 nm for **S140**, 5.62 nm for **S142**, 5.88 nm for **S161**.

In some cases, such as **S088**,  $d_0$  decreased after the intercalation. The longer alkyl chains of the guest generate the interdigitated states in the interlayer space (Fig. 1c). The original PCDA

has the similar interdigitated alkyl chains in the layered structure. The new periodicity originating from the interdigitated alkyl chains is generated with the intercalation of the guests. Such states were observed in our previous report.<sup>44</sup> The detailed analyses with changes in the alkyl chain length support the interpretation of a decrease in  $d_0$ .<sup>44</sup>

## FT-IR spectra

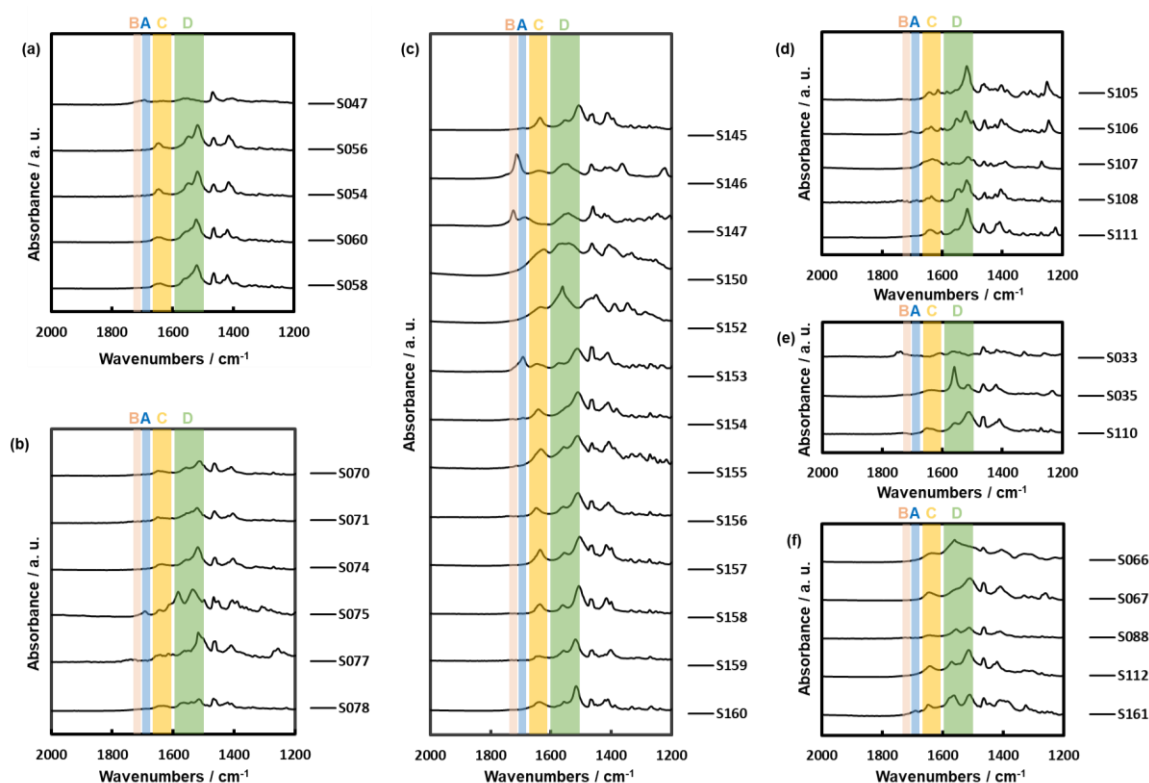

**Fig. S2.** FT-IR spectra of the newly synthesized layered PDA with the intercalation of the guests. (a) Polymeric and branched alkyl amines and amino-alcohols. (b) Amins containing benzene rings. (c) Amines containing cycloalkane rings. (d) Benzylamine derivatives. (e) Amins containing heteroaromatic rings. (f) Others.

The layered PDA without the interlayer guests only shows the absorption around  $1690\text{ cm}^{-1}$  corresponding to the stretching vibration of C=O group in the dimerized carboxy group (band A, blue). In most cases, the band A was not observed after the intercalation of the guests and the guest-intercalated PDAs showed the absorption in the range of  $1600\text{--}1650\text{ cm}^{-1}$  corresponding to the stretching vibration of C=O group in the dimerized carboxylate group (band C, yellow). The absorbance of the band A was drastically weakened in some cases, such as **S047** and **S075** (Fig. S2a,b). The absorption around  $1700\text{ cm}^{-1}$  corresponding to the stretching vibration of C=O group in the monomeric carboxy group was observed for other cases (band B, orange), such as **S146** and **S147** (Fig. S2c). The absorption in the range of  $1550\text{--}1600\text{ cm}^{-1}$  correspond to the stretching vibration of NH group in the amine salt (band D, green). These changes in the carboxy and amine groups indicate the intercalation of the guest molecules in the interlayer space.<sup>45–52</sup>

## $T$ - $\Delta x$ relationship and its approximation

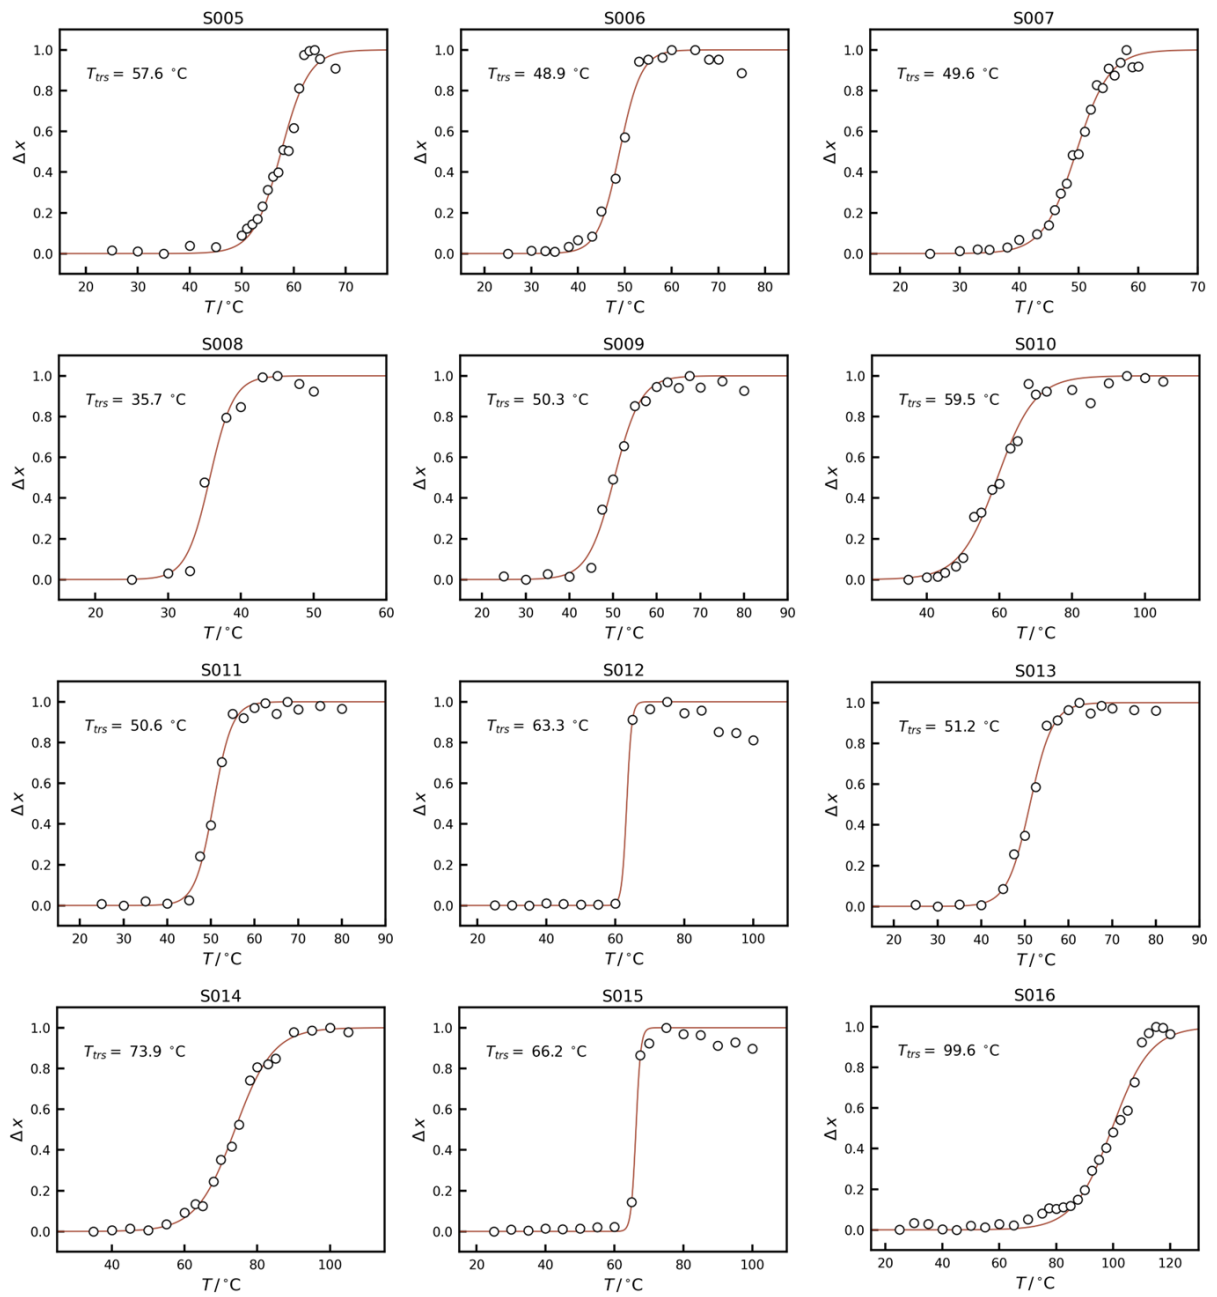

**Fig. S3-1.**  $T$ - $\Delta x$  relationship (plot), its approximation using sigmoidal function (red line), and calculated  $T_{trs}$  for all the data (75 y) used for the model construction.

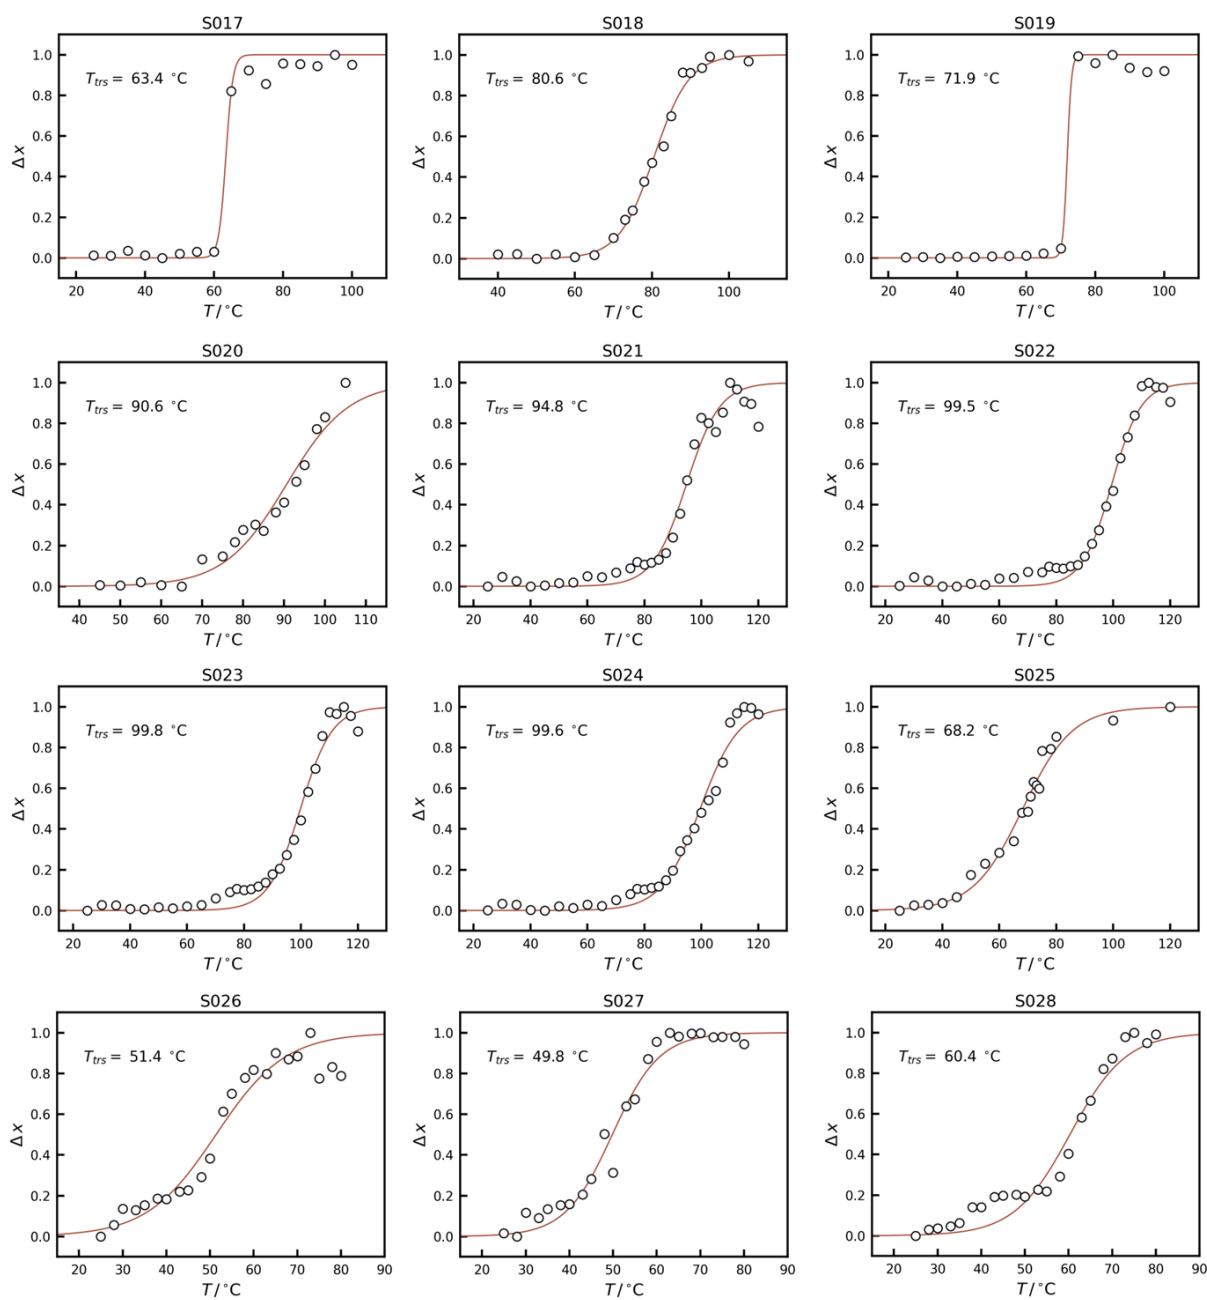

**Fig. S3-2.** (continued).

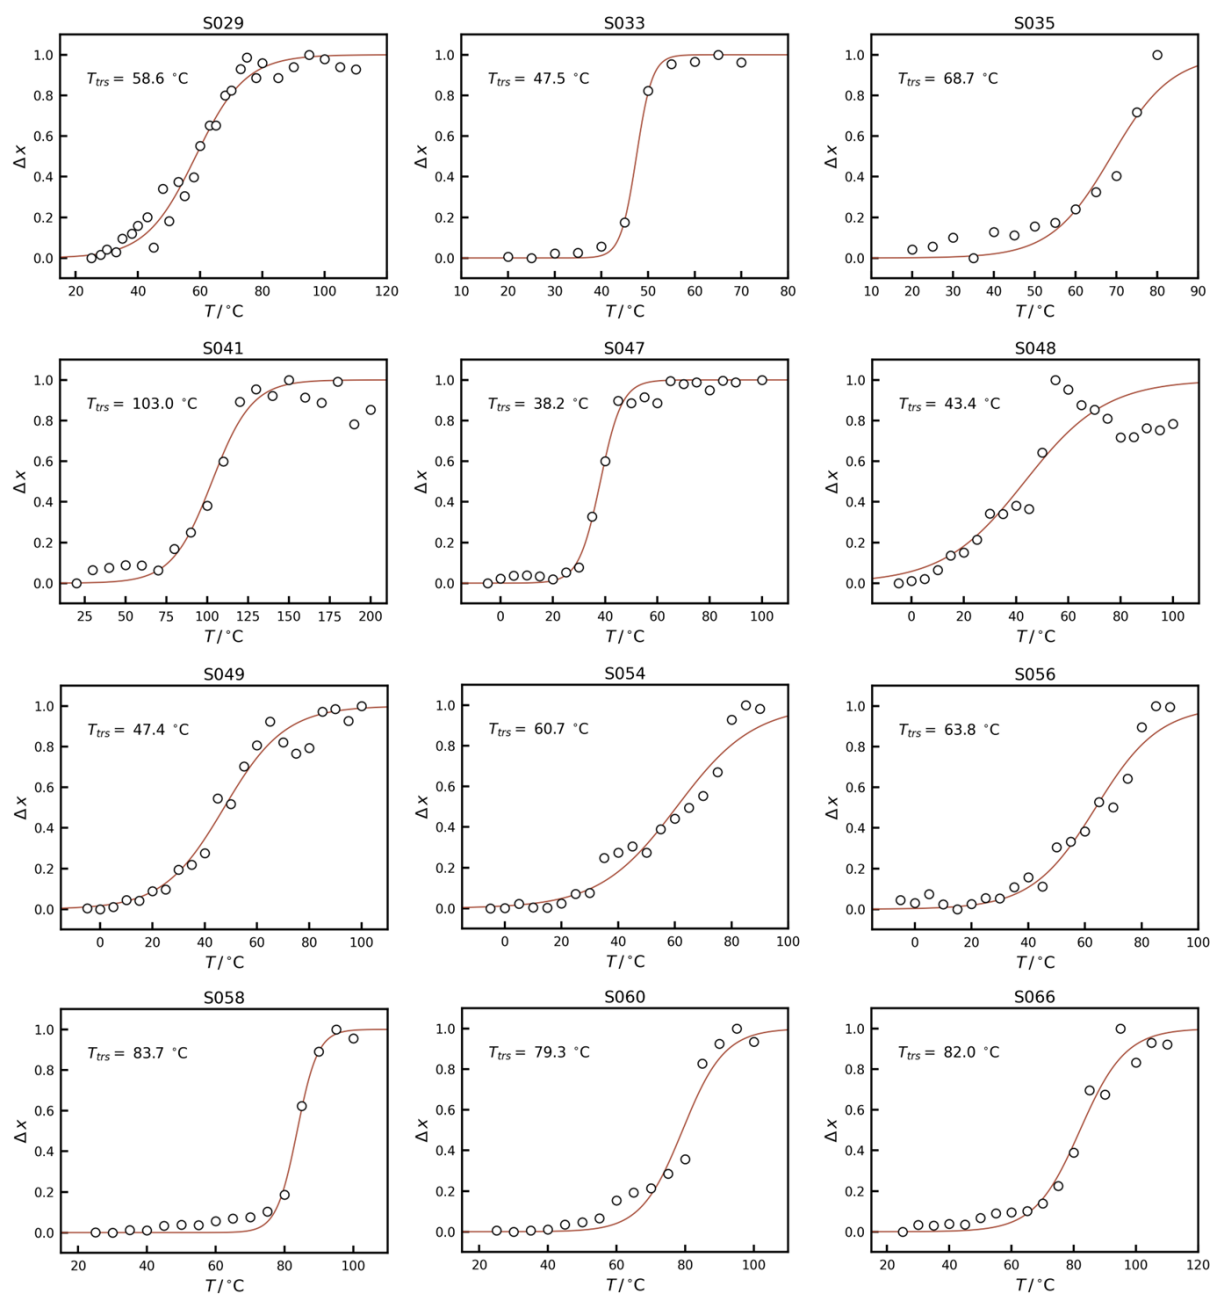

**Fig. S3-3.** (continued).

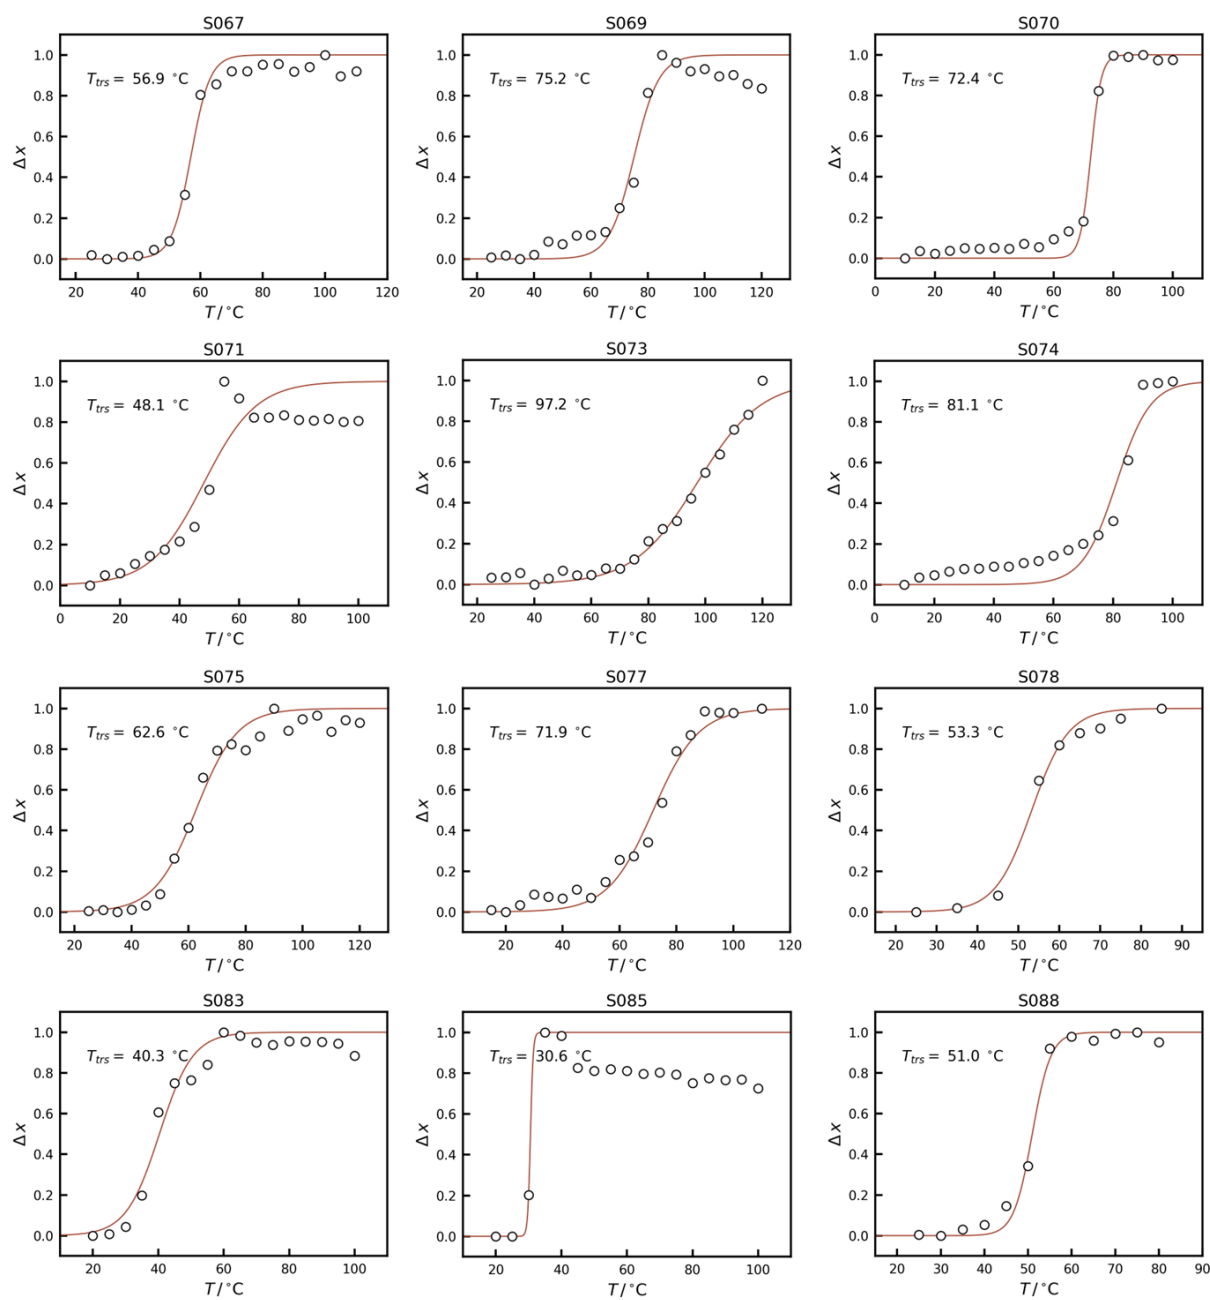

**Fig. S3-4.** (continued).



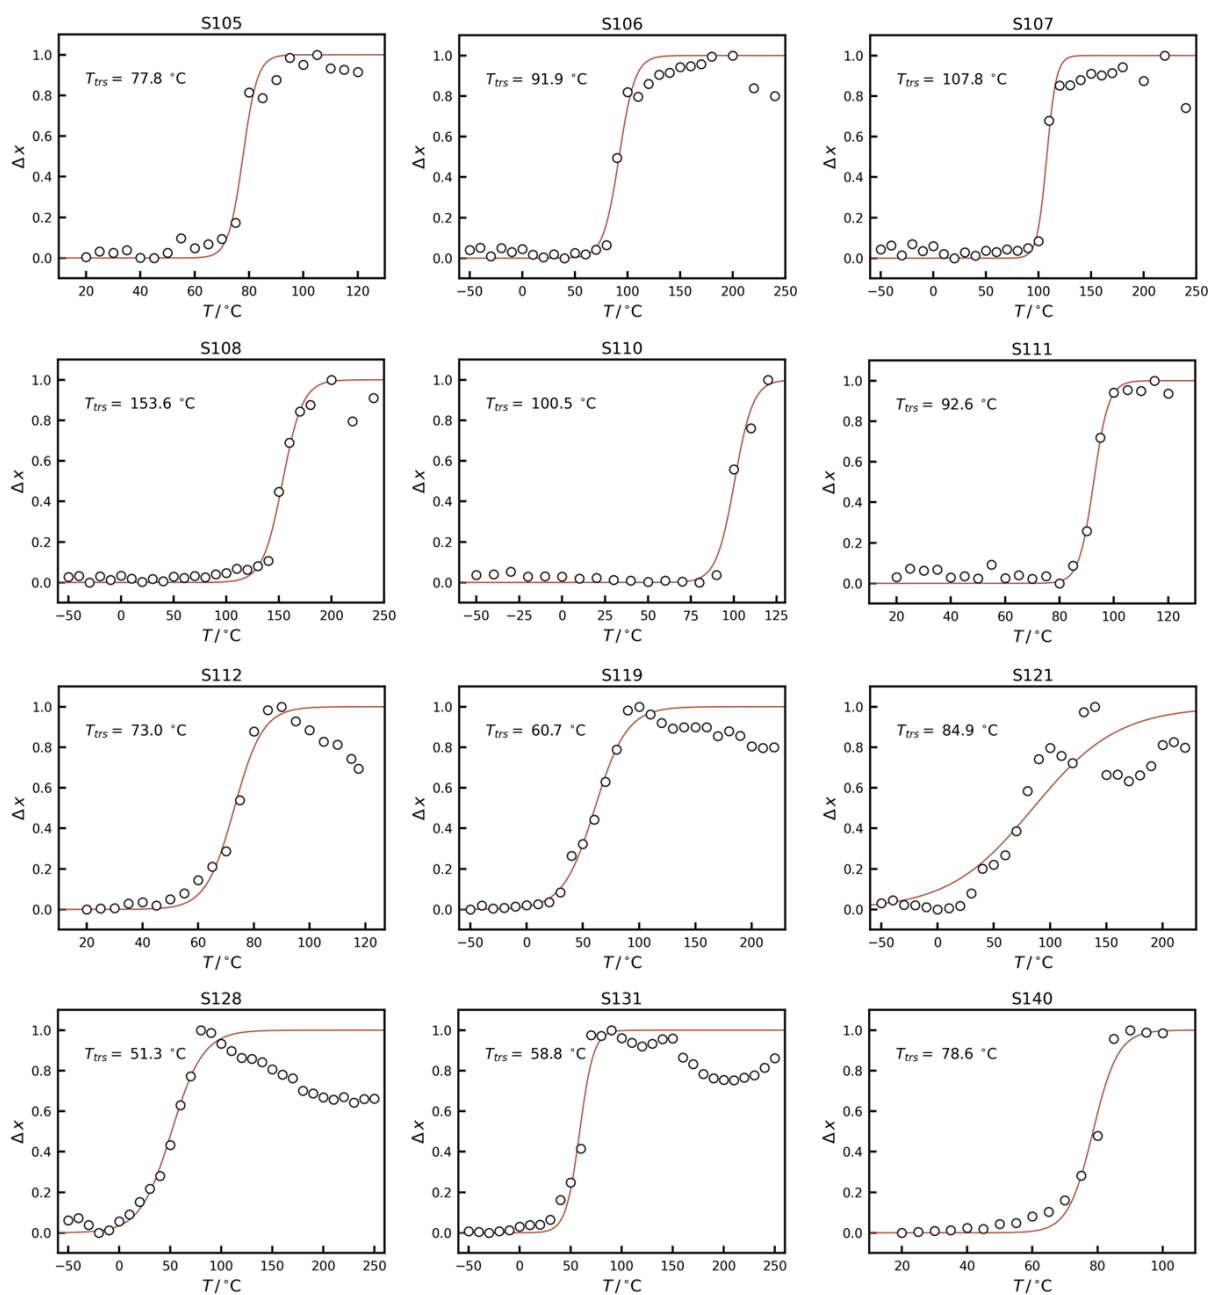

**Fig. S3-5.** (continued).

Note: The data of the samples **S106**, **S107**, **S108**, and **S110** were corrected using the  $T_{\text{trs}}$  values of the reference PDA sample without intercalation of the guests. As such deviation is caused by the measurement conditions, the correction based on the reference samples is needed.

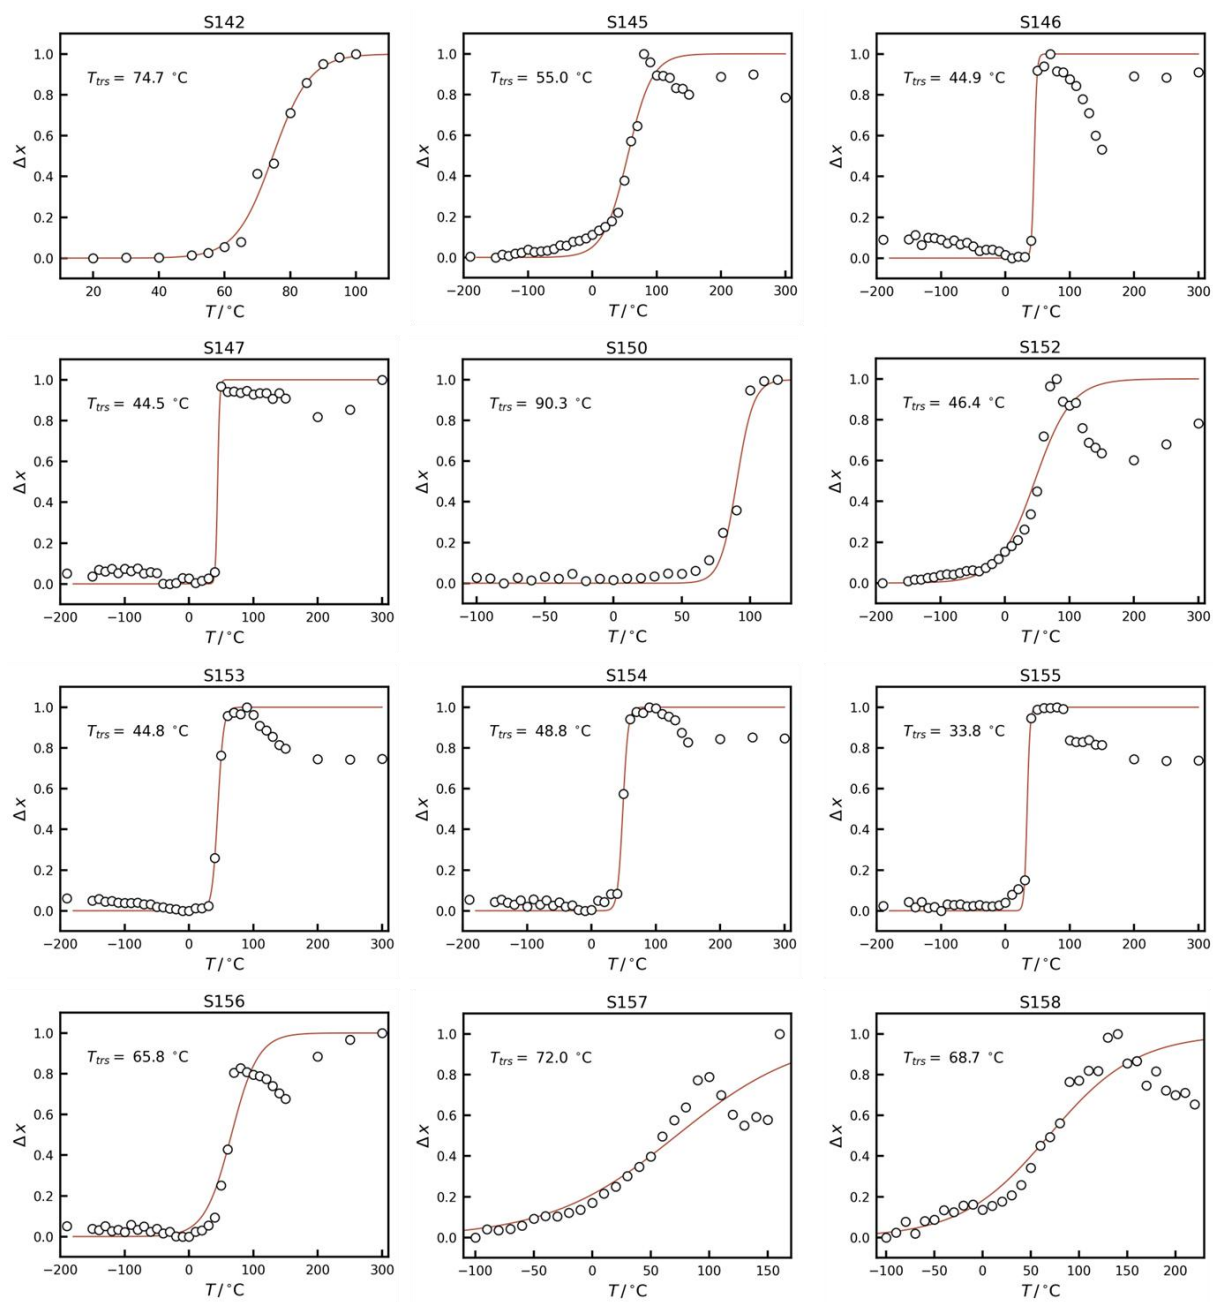

Fig. S3-6. (continued).

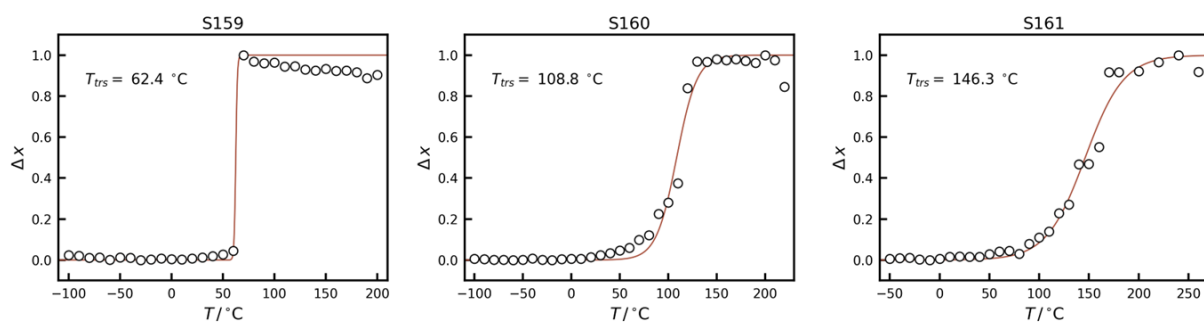

**Fig. S3-7.** (continued).

These observed  $T$ - $\Delta x$  plots (circles) were approximated using Eq. (1) with adjusting  $a$  and  $b$  to minimize the  $r^2$  value.

**Table S4.** List of the  $R^2$  values for the approximation of all the  $T$ - $\Delta x$  plots.

|                  |             |             |             |             |             |             |             |             |             |             |             |             |
|------------------|-------------|-------------|-------------|-------------|-------------|-------------|-------------|-------------|-------------|-------------|-------------|-------------|
| <b>Fig. S3-1</b> | <b>S005</b> | <b>S006</b> | <b>S007</b> | <b>S008</b> | <b>S009</b> | <b>S010</b> | <b>S011</b> | <b>S012</b> | <b>S013</b> | <b>S014</b> | <b>S015</b> | <b>S016</b> |
|                  | 0.9719      | 0.9894      | 0.9931      | 0.9785      | 0.9900      | 0.9823      | 0.9944      | 0.9737      | 0.9937      | 0.9951      | 0.9907      | 0.9813      |
| <b>Fig. S3-2</b> | <b>S017</b> | <b>S018</b> | <b>S019</b> | <b>S020</b> | <b>S021</b> | <b>S022</b> | <b>S023</b> | <b>S024</b> | <b>S025</b> | <b>S026</b> | <b>S027</b> | <b>S028</b> |
|                  | 0.9883      | 0.9939      | 0.9939      | 0.9650      | 0.9698      | 0.9855      | 0.9796      | 0.9813      | 0.9817      | 0.9408      | 0.9741      | 0.9596      |
| <b>Fig. S3-3</b> | <b>S029</b> | <b>S033</b> | <b>S035</b> | <b>S041</b> | <b>S047</b> | <b>S048</b> | <b>S049</b> | <b>S054</b> | <b>S056</b> | <b>S058</b> | <b>S060</b> | <b>S066</b> |
|                  | 0.9748      | 0.9968      | 0.9091      | 0.9574      | 0.9917      | 0.8361      | 0.9728      | 0.9544      | 0.9637      | 0.9893      | 0.9603      | 0.9723      |
| <b>Fig. S3-4</b> | <b>S067</b> | <b>S069</b> | <b>S070</b> | <b>S071</b> | <b>S073</b> | <b>S074</b> | <b>S075</b> | <b>S077</b> | <b>S078</b> | <b>S083</b> | <b>S085</b> | <b>S088</b> |
|                  | 0.9824      | 0.9587      | 0.9865      | 0.8589      | 0.9851      | 0.9324      | 0.9760      | 0.9816      | 0.9894      | 0.9650      | 0.6291      | 0.9916      |
| <b>Fig. S3-5</b> | <b>S105</b> | <b>S106</b> | <b>S107</b> | <b>S108</b> | <b>S110</b> | <b>S111</b> | <b>S112</b> | <b>S119</b> | <b>S121</b> | <b>S128</b> | <b>S131</b> | <b>S140</b> |
|                  | 0.9748      | 0.9701      | 0.9598      | 0.9752      | 0.9778      | 0.9880      | 0.9422      | 0.9447      | 0.8217      | 0.6690      | 0.8972      | 0.9814      |
| <b>Fig. S3-6</b> | <b>S142</b> | <b>S145</b> | <b>S146</b> | <b>S147</b> | <b>S150</b> | <b>S152</b> | <b>S153</b> | <b>S154</b> | <b>S155</b> | <b>S156</b> | <b>S157</b> | <b>S158</b> |
|                  | 0.9911      | 0.9473      | 0.8686      | 0.9770      | 0.9735      | 0.8113      | 0.9422      | 0.9752      | 0.9328      | 0.9130      | 0.8790      | 0.8793      |
| <b>Fig. S3-7</b> | <b>S159</b> | <b>S160</b> | <b>S161</b> |             |             |             |             |             |             |             |             |             |
|                  | 0.9896      | 0.9852      | 0.9842      |             |             |             |             |             |             |             |             |             |

The average  $R^2$  values were  $0.952 \pm 0.066$  for all the data in Fig. S3. Based on the  $R^2$  values and fitting results, the thermoresponsive color-changing properties are approximated by sigmoidal function to estimate  $T_{\text{trs}}$ .

### Correlation analysis of $x_{Gn}$

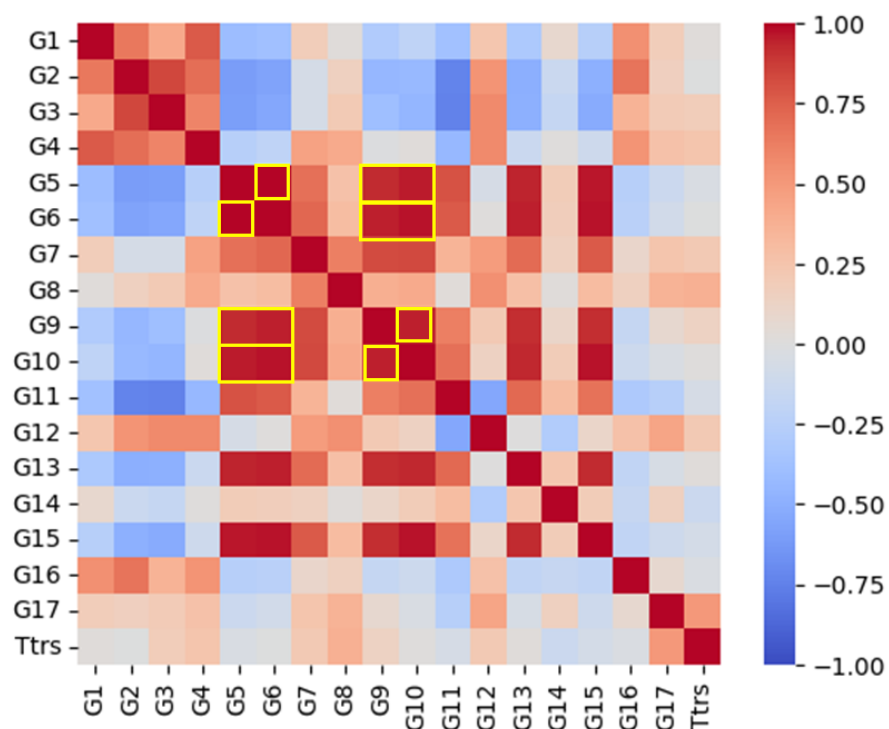

**Fig. S4.** Correlation analysis of 17  $x_{Gn}$ .

The heatmap indicates that the correlation coefficients of  $x_{G5}$ ,  $x_{G6}$ ,  $x_{G9}$ , and  $x_{G10}$  were larger than 0.9 (yellow frames in Fig. S4).

## Five-fold cross validation

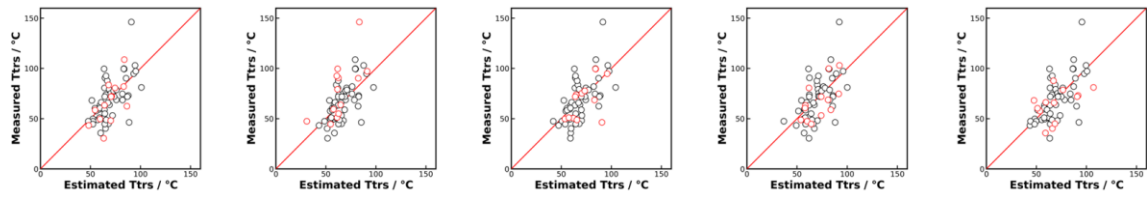

**Fig. S5.** Relationship between the estimated and measure  $T_{\text{trs}}$  for five-fold cross validation using the merged dataset of the original training and test ones (75 y).

This five-fold CV was carried out for the model consisting of the five  $x_{Gn}$  ( $x_{G4}$ ,  $x_{G12}$ ,  $x_{G14}$ ,  $x_{G16}$ , and  $x_{G17}$ ). The average RMSE was  $15.6 \pm 1.2$  °C for training and  $17.3 \pm 4.1$  °C for test.

## List of the new guest molecules

**Table S5.** New guest molecules for the experimental validation of the model.

|                                                                                   |                                                                                   |                                                                                    |                                                                                     |                                                                                     |
|-----------------------------------------------------------------------------------|-----------------------------------------------------------------------------------|------------------------------------------------------------------------------------|-------------------------------------------------------------------------------------|-------------------------------------------------------------------------------------|
| 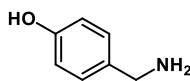 |  |   |   |  |
| <b>S901</b><br>4-(Aminomethyl)phenol<br>(OHBA)                                    | <b>S902</b><br>4-Methylbenzylamine<br>(MeBA)                                      | <b>S903</b><br>cis-1,2-<br>Cyclohexanediamine                                      | <b>S904</b><br>trans-1,3-<br>cyclohexanediamine                                     | <b>S905</b><br>1,5-Diaminopentane<br>(C5diami)                                      |
|  |  |  |  |                                                                                     |
| <b>S906</b><br>1,7-diaminoheptane                                                 | <b>S907</b><br>4-Aminobenzylamine                                                 | <b>S908</b><br>2-Ethylhexylamine                                                   | <b>S909</b><br>2-(Methylthio)ethylamine                                             |                                                                                     |

These guest molecules were not used in the training and test datasets for the model construction.

## Structural analysis for the new layered PDAs

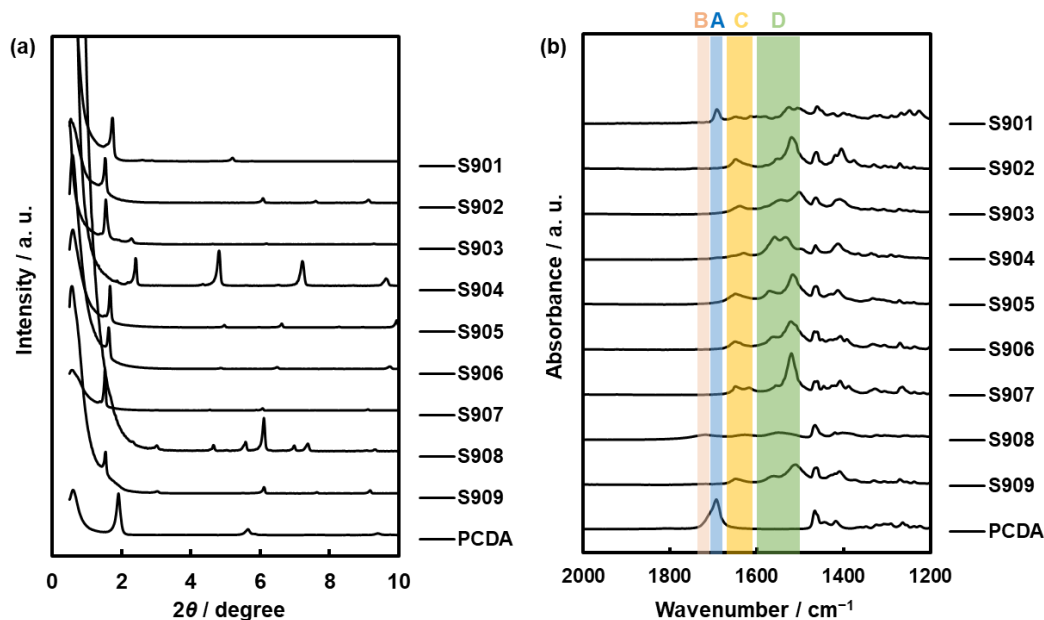

**Fig. S6.** XRD patterns (a) and FT-IR spectra (b) of the newly synthesized layered PDA with the intercalation of the guests **S901–S909**.

The original PCDA without the guest showed the interlayer distance ( $d_0$ ) 4.66 nm. The peak shift indicating the intercalation of the guests was observed for all these guests (Fig. S6a). The observed  $d_0$  was as follows: (a) 5.08 nm for **S901**, 5.77 nm for **S902**, 6.28 nm for **S903**, 3.61 nm for **S904**, 5.29 nm for **S905**, 5.42 nm for **S906**, 5.80 nm for **S907**, 5.79 nm for **S908**, 5.75 nm for **S909**. In FT-IR spectra (Fig. S6), the changes in the carboxy and amine groups were observed for all these guests. Please see the explanations in Fig. S2.

## $T$ - $\Delta x$ relationship for the new layered PDAs

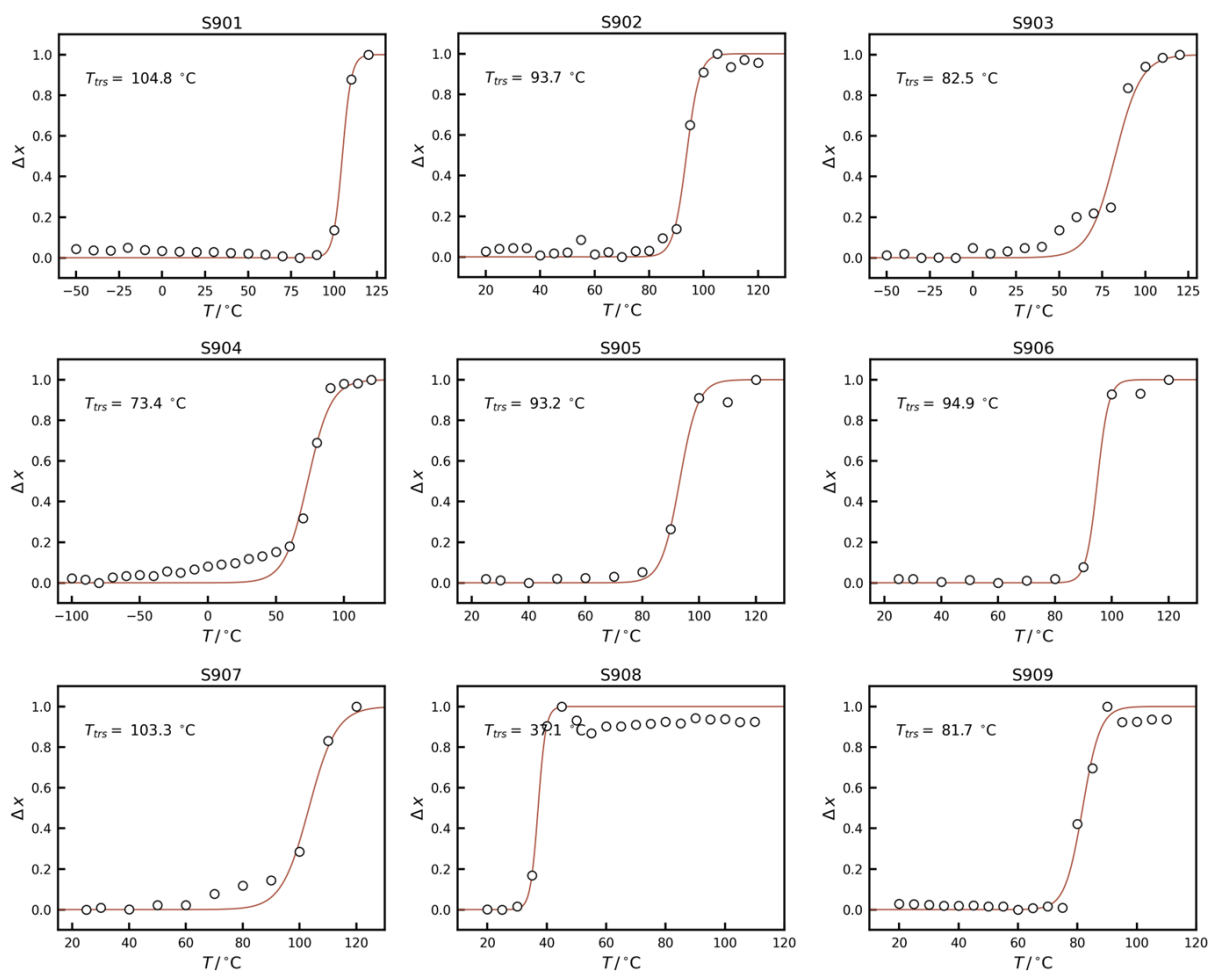

**Fig. S7.**  $T$ - $\Delta x$  relationship (plot), its approximation using sigmoidal function (red line), and calculated  $T_{\text{trs}}$  for the newly synthesized layered PDA (S901-S909) for the experimental validation.
